# Supplementary material for: Rapid analysis of isotopically unmodified amino acids by high-resolution 14N-edited 1H–13C correlation NMR spectroscopy
Source: Royal Society of Chemistry journal article supplement (doi:10.1039/b816362f), 2008-01-01
Supplement: b816362f.pdf [file b816362f.pdf]

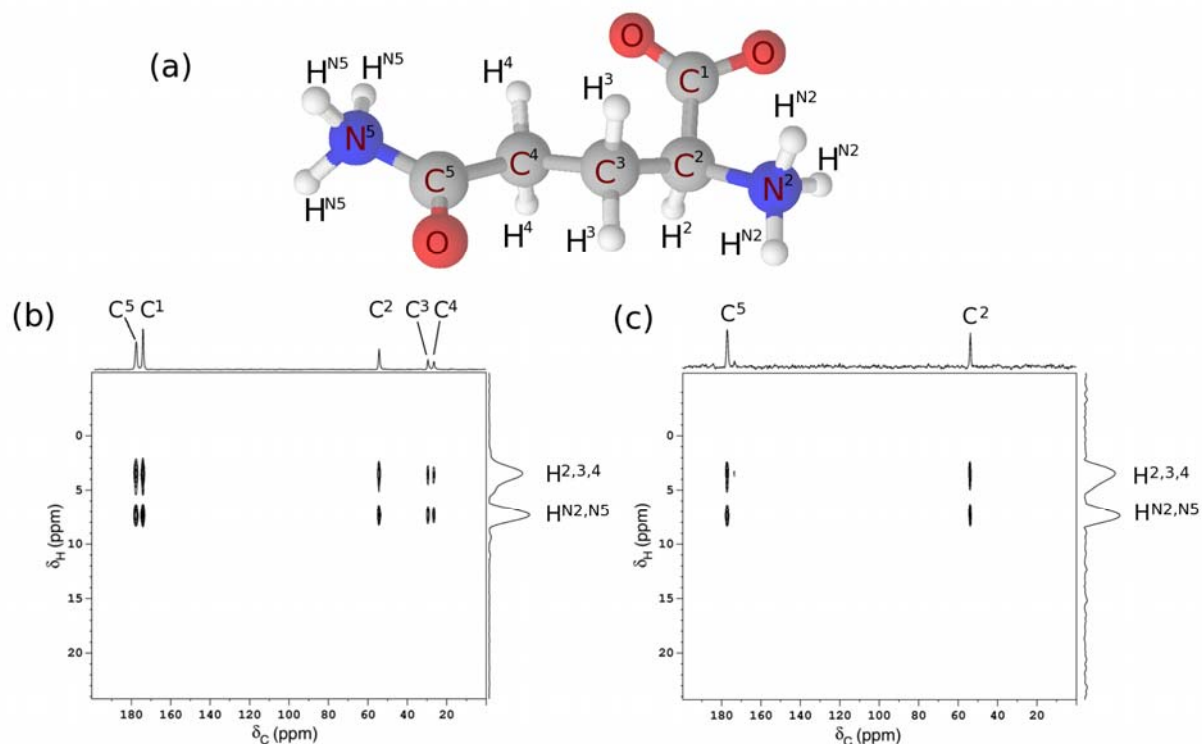

**Fig.3** L-glutamine. (a) Molecular structure with atom labelling matching IUPAC recommendations.<sup>21</sup> (b,c) CP-HETCOR spectra with : (b) all ( $S_0$ ) or (c)  $^{14}\text{N}$ -edited ( $S_0$ - $S_1$ )  $^1\text{H}$ - $^{13}\text{C}$  cross-peaks.  $PM\text{LG}_{\text{S}}^{\pm}$  decoupling scheme was applied during  $t_1$  with  $\nu_{1-1\text{H}} = 99$  kHz and  $\tau_D = 1.4$   $\mu\text{s}$ .  $^1\text{H}$  axis has been rescaled. Spectra are the result of averaging 320 transients for each of 70  $t_1$  increments with  $\Delta t_1 = 70$   $\mu\text{s}$ , with a recycle time of 2s. The total experimental time for the two spectra has been of 25 hrs (320\*70\*2\*2 sec). The SFAM<sub>1</sub> scheme was used for  $^{13}\text{C}$ - $^{14}\text{N}$  recoupling with  $\tau_{\text{rec}} = 814$   $\mu\text{s}$ ,  $\nu_{\text{rec}}^{\text{peak}} = 41$  kHz and  $\Delta\nu_{0-13\text{C}} = 20$  kHz.  $^1\text{H}$ - $^{13}\text{C}$  CP-MAS: contact time = 2.5 ms,  $\nu_{1-13\text{C}} = 54$  kHz, the power of  $^1\text{H}$  is optimized with tangent-ramped shape.  $B_0 = 9.4$  T,  $\nu_R = 13.51$  kHz,  $\nu_{1-14\text{N}} = 50$  kHz.  $^1\text{H}$  decoupling :  $\nu_{1-1\text{H}} = 86$  kHz.  $^{13}\text{C}$   $\pi$  and  $\pi/2$  pulses:  $\nu_{1-13\text{C}} = 50$  kHz.
